# Supplementary material for: Canine dorsal root ganglia satellite glial cells represent an exceptional cell population with astrocytic and oligodendrocytic properties
Source: PubMed Central journal article supplement (PMC5654978; doi:10.1038/s41598-017-14246-7), 2017-10-24

## 1 **Supplementary Information**

### 2 **Canine dorsal root ganglia satellite glial cells represent an exceptional cell** 3 **population with astrocytic and oligodendrocytic properties**

4 W. Tongtako, A. Lehmbecker, Y. Wang, K. Hahn, W. Baumgärtner, I. Gerhauser

5

6 **Supplementary Fig. S1:** Preparation of a pooled satellite glial cell (SGC)-enriched  
7 cell fraction of 4 dogs. Isolated dorsal root ganglia from one dog were splitted on 2  
8 tubes for digestion and subsequent 25% and 27% Percoll centrifugation. About 4 ml  
9 of the myelin-poor fraction were collected per tube (in total approximately 16 ml for  
10 each dog). For 1:3 dilution, the 16 ml were pipetted in a 50 ml Falcon tube and filled  
11 with Dulbecco's modified eagle medium (DMEM) with 1% Penicillin/Streptomycin  
12 (PS) and 10% fetal calf serum (FCS) to a volume of 48 ml (4 tubes for 4 dogs). The  
13 following centrifugation (5 min at 300 x g and 4°C) leads to a cell pellet containing  
14 SGCs, other non-neuronal cells, and small to moderate numbers of neurons. The cell  
15 pellet of one dog was resuspended in 2 ml DMEM with 1% PS and 10% FCS. This  
16 suspension was used to resuspend consecutively cell pellets of the other dogs and  
17 finally contains the non-neuronal cells of four dogs in 2 ml DMEM with 1% PS and  
18 10% FCS. Two tubes containing 5 ml 25% Percoll were prepared, layered with 1 ml  
19 of the SGC-enriched resuspension, and centrifuged (15 min at 450 x g and 4°C). The  
20 resulting cell pellet contains the remaining neurons. About 4.5 ml of the supernatant  
21 were collected from the two tubes, pooled in a 50 ml Falcon tube, and diluted 1:3 by  
22 adding 18 ml DMEM with 1% PS and 10% FCS. The following centrifugation (5 min  
23 at 300 x g and 4°C) results in a cell pellet containing SGC and other non-neuronal  
24 cells, which was resuspended in Sato's Medium with 0.25% bovine serum albumin  
25 (BSA). The cell content was evaluated using a Neubauer chamber.

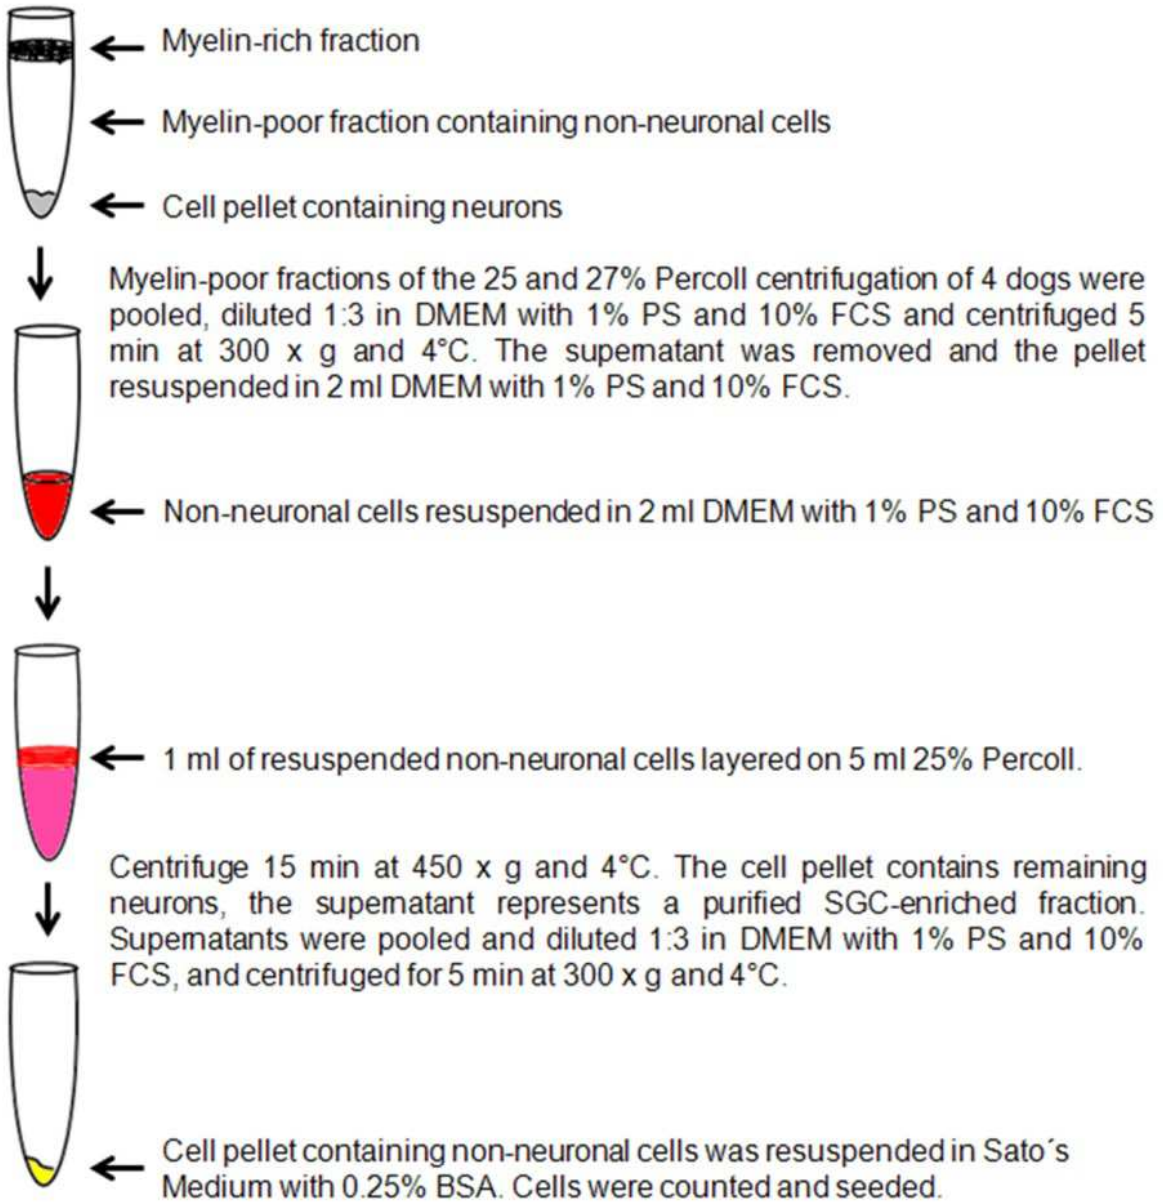

26

27

28 **Supplementary Fig. S2:**

29 Dorsal root ganglion of a 1-year-old beagle dog (**a, c, d**) and a 4-year-old northern  
30 plains gray langur (*Semnopithecus entellus*) (**b**). The majority of canine (**a**) and  
31 simian (**b**) satellite glial cells (SGCs) expressed vimentin. Few canine SGCs also  
32 expressed S-100 (**c**). Most of canine SGCs showed a strong intranuclear expression  
33 of Sox2 (**d**). Bars, 40  $\mu\text{m}$ .

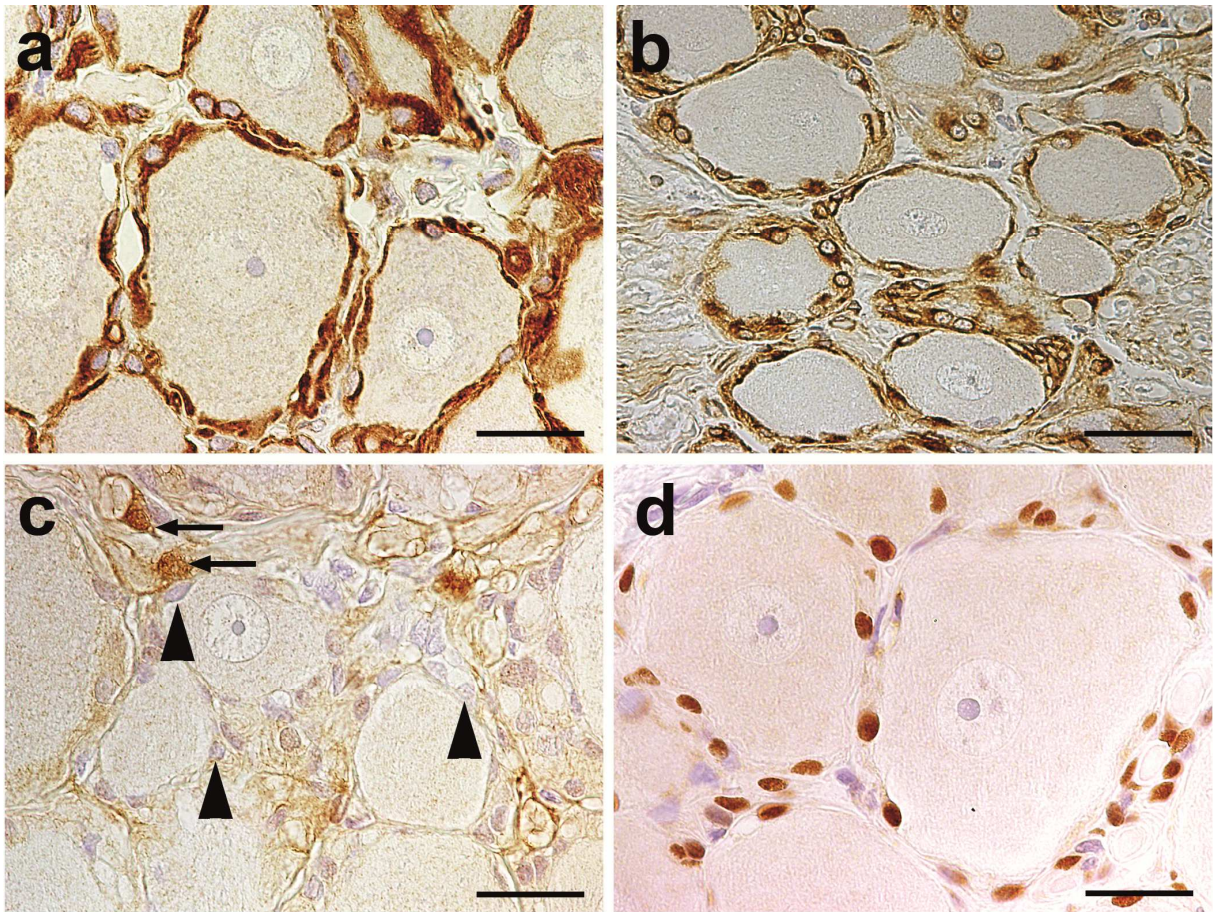

34



35 **Supplementary Fig. S3:**

36 Dorsal root ganglion of a 4-month-old mouse **(a)** and a 4-year-old northern plains  
37 gray langur (*Semnopithecus entellus*) **(b)**. Multiple neurons surrounded by a satellite  
38 glial cell sheath. Note few fibroblasts and capillaries in the interstitial stroma.  
39 Hematoxylin and eosin staining. Bars, 40  $\mu\text{m}$ .

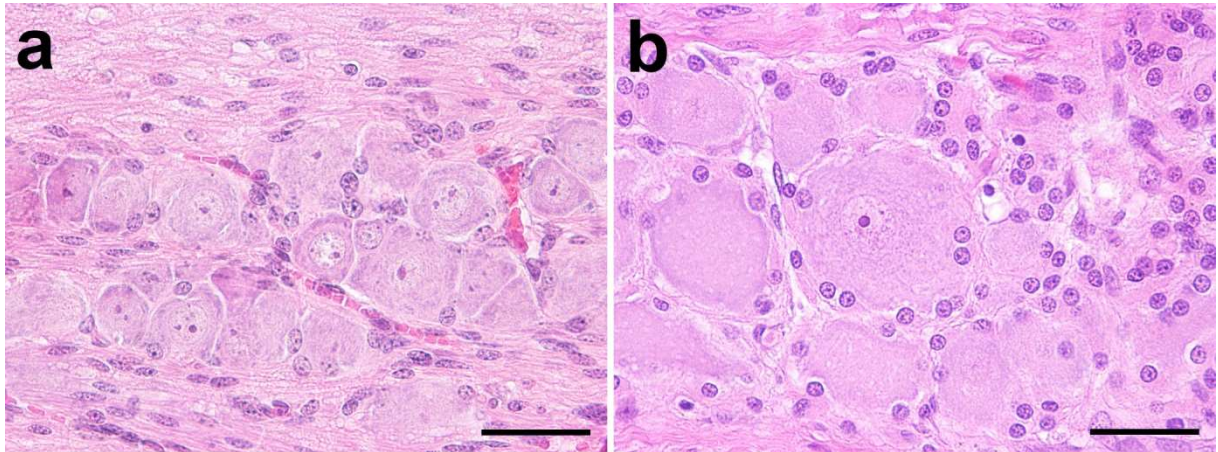

40

41 **Supplementary Fig. S4:**

42 Dorsal root ganglion of a female 22-month-old beagle dog. Immune transmission  
43 electron microscopy for the intermediate filament glial fibrillary acidic protein (GFAP).

44 **(a)** Morphology of GFAP<sup>+</sup> satellite glial cells *in vitro*. The marked area is shown in a  
45 higher magnification in **"b"**. Bar, 1  $\mu$ m. **(b)** Higher magnification of the marked area in  
46 **"a"** showing the cytoplasmic GFAP filaments labeled with gold particles (arrows). Bar,  
47 200 nm.

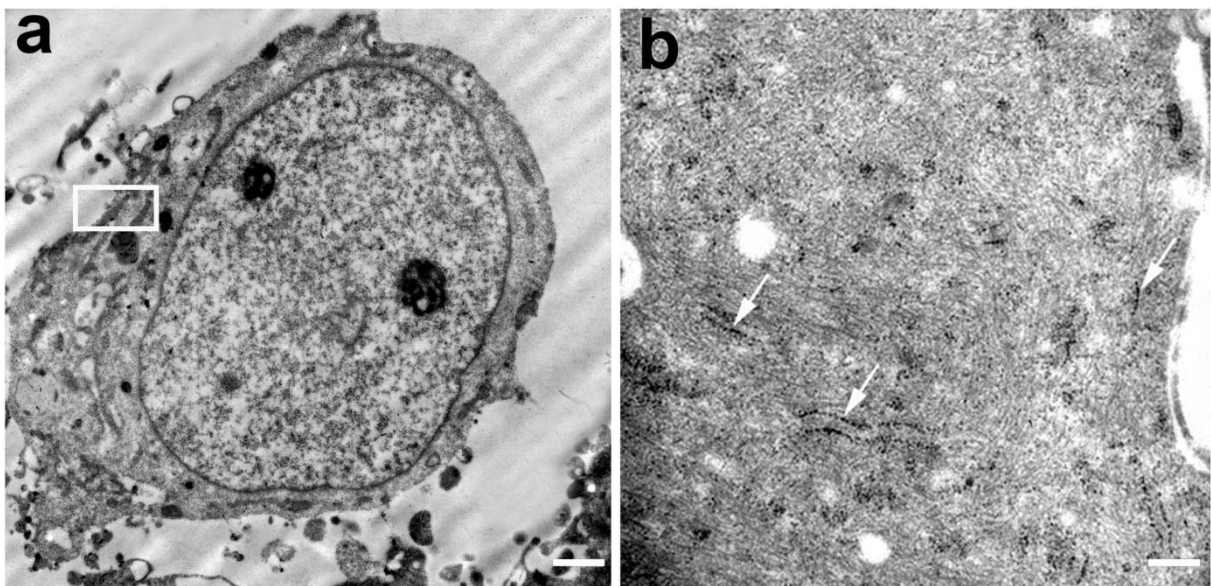

Supplement: 41598_2017_14246_MOESM1_ESM.pdf [file 41598_2017_14246_MOESM1_ESM.pdf]
